# Supplementary material for: Nanoplastics and Arsenic Co-Exposures Exacerbate Oncogenic Biomarkers under an In Vitro Long-Term Exposure Scenario
Source: MDPI journal article supplement (doi:10.3390/ijms23062958), 2022-03-09
Supplement: s1 [file s1]

# **Nanoplastics and arsenic co-exposures exacerbate oncogenic biomarkers under an *in vitro* long-term exposure scenario**

**Irene Barguilla<sup>1</sup>, Josefa Domenech<sup>1</sup>, Laura Rubio<sup>2</sup>, Ricard Marcos<sup>1,§</sup>, Alba Hernández<sup>1,§</sup>**

**SUPPLEMENTARY MATERIAL**

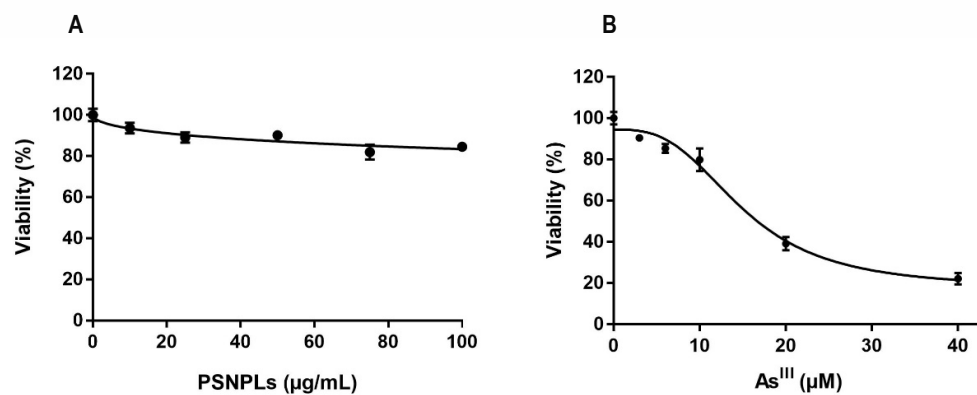

**Figure S1.** Relative survival of PTP cells after 24 h of exposure to PSNPLs (A) and As<sup>III</sup> (B). Data are presented as the percentage of counted cells relative to the untreated control  $\pm$  SEM.
